# Supplementary material for: A Comparison of Key Essential Nutrients in Commercial Plant-Based Pet Foods Sold in Canada to American and European Canine and Feline Dietary Recommendations
Source: MDPI journal article supplement (doi:10.3390/ani11082348), 2021-08-09
Supplement: s1 [file s1]

**Supplementary table 1: Summary of products.**

| Product | Country of Origin | Form     | Labelled species | Labelled lifestage     |
|---------|-------------------|----------|------------------|------------------------|
| 1       | Italy             | Extruded | Dog              | Adult maintenance      |
| 2       | Italy             | Extruded | Dog              | Adult maintenance      |
| 3       | Italy             | Extruded | Cat              | Adult maintenance      |
| 4       | Italy             | Canned   | Dog              | Adult maintenance      |
| 5       | Italy             | Canned   | Dog              | Adult maintenance      |
| 6       | United Kingdom    | Extruded | Dog              | Adult maintenance      |
| 7       | United Kingdom    | Extruded | Dog              | Adult maintenance      |
| 8       | United Kingdom    | Extruded | Dog              | Growth and development |
| 9       | United Kingdom    | Extruded | Cat              | Adult maintenance      |
| 10      | United Kingdom    | Canned   | Cat and Dog      | Adult maintenance      |
| 11      | United Kingdom    | Tray     | Dog              | Adult maintenance      |
| 12      | USA               | Extruded | Dog              | All life stages        |
| 13      | USA               | Extruded | Dog              | All life stages        |
| 14      | USA               | Extruded | Dog              | All life stages        |
| 15      | USA               | Extruded | Cat              | All life stages        |
| 16      | USA               | Extruded | Cat              | All life stages        |
| 17      | USA               | Canned   | Cat and Dog      | All life stages        |
| 18      | USA               | Canned   | Cat and Dog      | All life stages        |
| 19      | Canada            | Extruded | Dog              | Adult maintenance      |
| 20      | USA               | Extruded | Dog              | Adult maintenance      |
| 21      | USA               | Canned   | Dog              | Adult maintenance      |
| 22      | USA               | Extruded | Dog              | Adult maintenance      |
| 23      | USA               | Canned   | Dog              | Adult maintenance      |
| 24      | Canada            | Extruded | Dog              | All life stages        |
| 25      | Canada            | Extruded | Cat              | All life stages        |
| 26      | Canada            | Extruded | Dog              | Adult maintenance      |
